# Supplementary material for: Utilizing Single-cell RNA Sequencing for Analyzing the Characteristics of PBMC in Patients with Kawasaki Disease
Source: Research Square preprint supplement (doi:10.21203/rs.3.rs-293967/v1), 2021-03-16
Supplement: Supplementary file 1 [file 69812269ba4068ad415525ff.xlsx]

## Sheet: Sheet1
Table S1 Statistical table of gene expression in single cell RNA-seq
Sample	Estimated Number of Cells	Fraction Reads in Cells	Mean Reads per Cell	Median Genes per Cell	Total Genes Detected	Median UMI Counts per Cell
KD	10784	0.959	52925	1755	22585	4186
normal	9046	0.975	55911	688	20266	1386
